# Supplementary material
Source: Springer Nature journal article supplement (https://www.springermedizin.de/resource/supplementary/12967_2011_831_MOESM3_ESM.pdf/9577132)
Supplement: MOESM3 [file 9577132]

**A**

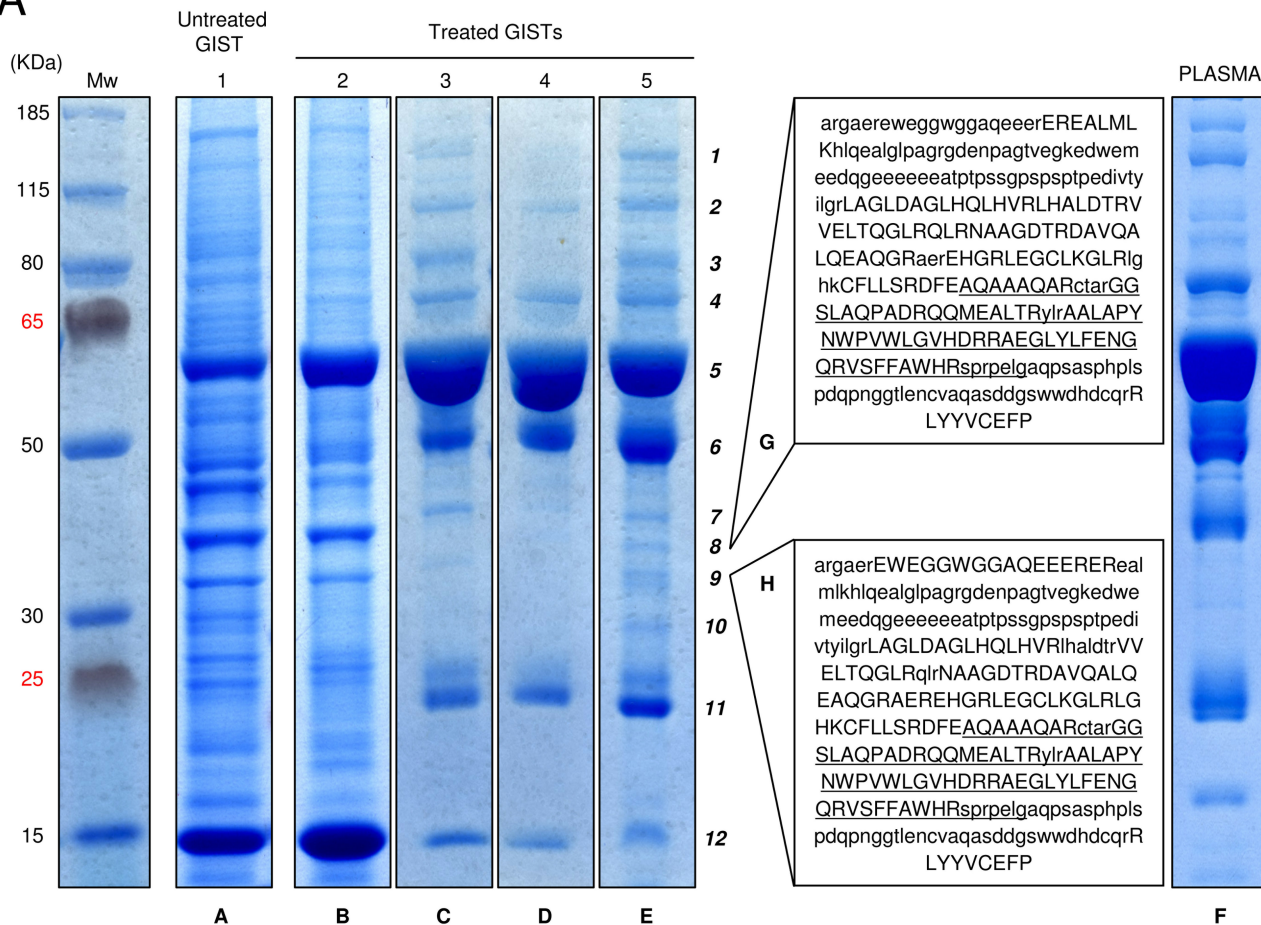

**B**

| Band no. <sup>1</sup> | AC <sup>2</sup> | DE <sup>3</sup>                       | Mw <sup>4</sup> |
|-----------------------|-----------------|---------------------------------------|-----------------|
| 1                     | P08603          | Complement factor H                   | 137             |
| 2                     | P01024          | Complement C3                         | 185             |
| 3                     | P01857          | Ig gamma-1 chain C region             | 36              |
| 4                     | P02787          | Serotransferrin                       | 75              |
| 5                     | P02768          | Serum albumin                         | 66              |
| 6                     | P01857          | Ig gamma-1 chain C region             | 36              |
| 7                     | P60709          | Actin, cytoplasmic                    | 42              |
| 8                     | Q9Y240          | <i>Stem cell growth factor</i>        | 34              |
| 9                     | Q9Y240          | <i>Stem cell growth factor</i>        | 34              |
| 10                    | P02746          | Complement C1q subcomponent subunit B | 24              |
| 11                    | P02647          | Apolipoprotein A-I                    | 28              |
| 12                    | P68871          | Hemoglobin subunit beta               | 16              |
